# Supplementary material for: Microstructural morphologies of CTAB micelles modulated by aromatic acids
Source: Royal Society of Chemistry journal article supplement (doi:10.1039/c6ra24271e), 2016-01-01
Supplement: c6ra24271e1.pdf [file c6ra24271e1.pdf]

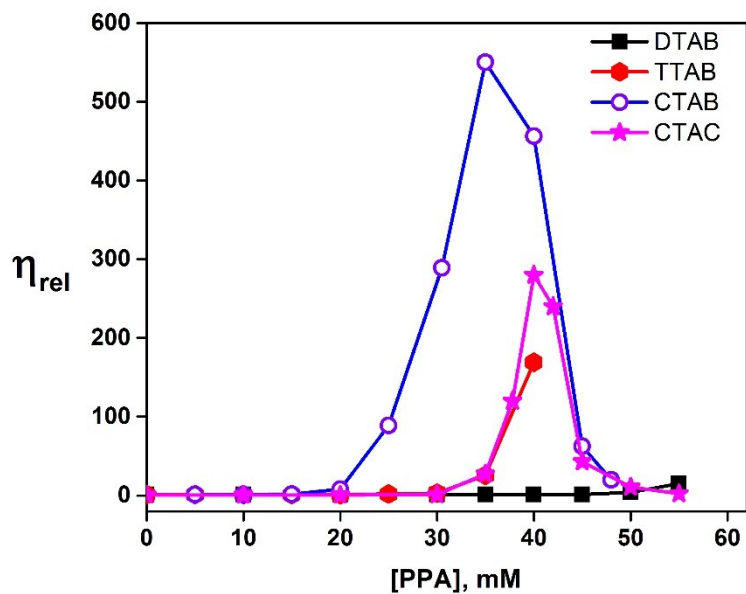

**Supplementary Fig.1.** Effect of PPY concentration on the relative viscosity of 50 mM surfactants at 30 °C.
